1

## Title Page

2 **Full title:** COVID-19 Associated Stroke—A Single Centre Experience

3 **Authors:**

4 1. Dr Uma Sundar<sup>1</sup>, MD.

5 2. Dr Niteen D Karnik<sup>1</sup>, MD.

6 3. Dr Amita Mukhopadhyay<sup>2</sup>, MD.

7 4. Dr Pramod Darole<sup>3</sup>, MD.

8 5. Dr Shaonak Kolte<sup>4</sup>, MBBS.

9 6. Dr Ashank Bansal<sup>5</sup>, MD.

10 7. Dr Yojana A Gokhale<sup>1</sup>, MD.

11 8. Dr Dnaneshwar Asole<sup>6</sup>, DNB (Neurology).

12 9. Dr Anagha Joshi<sup>7</sup>, MD.

13 10. Dr Sangeeta Pednekar<sup>1</sup>, MD.

14 11. Dr Swati Chavan<sup>1</sup>, MD.

15 12. Dr Trupti Trivedi<sup>1</sup>, MD.

16 13. Dr Namita Padwal<sup>3</sup>, MD.

17 14. Dr Lalana Kalekar<sup>3</sup>, MD.

18 15. Dr Charulata Londhe<sup>3</sup>, MD.

19 16. Dr Rupal Padhiyar<sup>3</sup>, MD.

20 17. Dr Dharmendra Pandey<sup>3</sup>, MD.

21 18. Dr Dharendra Yadav<sup>6</sup>, MD.

22 19. Dr Sonal U Honrao<sup>6</sup>, MD.

23 20. Dr Prerana Bhavsar<sup>6</sup>, MD.

24 21. Dr Priyanshu Shah<sup>6</sup>, MD.

25 22. Dr Satish Gosavi<sup>8</sup>, MD.

- 26 23. Dr Aniket Wadal<sup>6</sup>, MD.
- 27 24. Dr Awesh P Shingare<sup>6</sup>, DNB (Endocrinology).
- 28 25. Dr Mayuri Trivedi<sup>6</sup>, DM (Nephrology).
- 29 26. Dr Gauri Pathak Oak<sup>6</sup>, MD.

30

31 **Author Affiliations:**

- 32 1. Professor, Medicine. Lokmanya Tilak Municipal Medical College and General  
33 Hospital (LTMMC&GH), Sion, Mumbai 400022, Maharashtra, India.
- 34 2. Associate Professor, Community Medicine. Dr Chandramma Dayananda Sagar  
35 Institute of Medical Education and Research, Kanakapura 562112, Ramanagara  
36 District, Karnataka, India.
- 37 3. Associate Professor, Medicine. LTMMC&GH, Mumbai, India.
- 38 4. Research assistant, Medicine. LTMMC&GH, Mumbai, India.
- 39 5. Assistant Professor, Radiology. LTMMC&GH, Mumbai, India.
- 40 6. Assistant Professor, Medicine. LTMMC&GH, Mumbai, India.
- 41 7. Professor, Radiology. LTMMC&GH, Mumbai, India.
- 42 8. Senior resident, Medicine. LTMMC&GH, Mumbai, India.

43

44 Corresponding Author: Dr Uma Sundar

45 Email: [umasundar2@rediffmail.com](mailto:umasundar2@rediffmail.com)

46

47 Total number of tables and figures: Tables 4; Figures 3.

48 Word Count: Abstract 297; Text 3609.

49

50

51 **Abstract**

52 **Background and Purpose:** Various neurological complications have been reported in  
53 association with COVID-19. We report our experience of COVID-19 with stroke at a single  
54 center over a period of eight months spanning 1 March to 31 October 2020.

55 **Methods:** We recruited all patients admitted to Internal Medicine with an acute stroke, who  
56 also tested positive for COVID-19 on RTPCR. We included all stroke cases in our analysis  
57 for prediction of in-hospital mortality, and separately analyzed arterial infarcts for  
58 vascular territory of ischemic strokes.

59 **Results:** There were 62 stroke cases among 3923 COVID-19 admissions (incidence 1.6%).  
60 Data was available for 58 patients {mean age 52.6 years; age range 17–91; F/M=20/38; 24%  
61 (14/58) aged  $\leq 40$ ; 51% (30/58) hypertensive; 36% (21/58) diabetic; 41% (24/58) with O<sub>2</sub>  
62 saturation  $< 95\%$  at admission; 32/58 (55.17 %) in-hospital mortality}. Among 58 strokes,  
63 there were 44 arterial infarcts, seven bleeds, three arterial infarcts with associated cerebral  
64 venous sinus thrombosis, two combined infarct and bleed, and two of indeterminate type.  
65 Among the total 49 infarcts, Carotid territory was the commonest affected (36/49; 73.5%),  
66 followed by vertebrobasilar (7/49; 14.3%) and both (6/49; 12.2%). Concordant arterial block  
67 was seen in 61% (19 of 31 infarcts with angiography done). ‘Early stroke’ (within 48 hours  
68 of respiratory symptoms) was seen in 82.7% (48/58) patients. Patients with poor saturation at  
69 admission were older (58 vs 49 years) and had more comorbidities and higher mortality (79%  
70 vs 38%). Mortality was similar in young strokes and older patients, although the latter  
71 required more intense respiratory support. Logistic regression analysis showed that low GCS  
72 and requirement for increasing intensity of respiratory support predicted in-hospital mortality.  
73 **Conclusions:** We had a 1.6% incidence of COVID-19 related stroke of which the majority  
74 were carotid territory infarcts. In-hospital mortality was 55.17%, predicted by low GCS at  
75 admission.

76 **Introduction:**

77 Various neurological complications, ranging from hypogeusia, headache and anosmia, to  
78 Stroke, movement disorders, ataxia and myelitis, have been reported in association with  
79 COVID-19.(1,2) Acute stroke has been documented as a life threatening complication of  
80 COVID-19 in various reports since April 2020, the incidence reported ranging from 0.6% to  
81 6%.(1–5) A pooled frequency of seven studies using the fixed effect model, estimated the  
82 incidence of acute stroke in COVID-19 to be 1.1%.(6) The proposed mechanisms include a  
83 virus induced prothrombotic state, endothelial injury, vasculitis, cardiomyopathy,  
84 microvascular thrombosis and cytokine storm.(7–9) We report our experience of COVID-19  
85 with stroke over a period of eight months spanning March to October 2020.

86 **Aims:** We aimed to document the incidence of acute strokes among COVID-19 presentations  
87 at our hospital, to delineate the different types of strokes, and their possible mechanism. We  
88 also aimed to evaluate severity of respiratory involvement, severity of the stroke, and  
89 laboratory evidence of ongoing inflammation in these patients. Further, we aimed to  
90 determine in-hospital outcome in terms of mortality, and to evaluate the independent clinical  
91 and imaging predictors of mortality in stroke associated with COVID-19.

92 **Methods:**

93 Our study center is a 1400 bedded, tertiary care, municipal public hospital in Mumbai, India.  
94 We performed a prospective and retrospective observational study with serial recruitment of  
95 all patients who presented to the department of Internal Medicine with an acute stroke  
96 between 1 March and 31 October 2020, who also had a reverse transcriptase-polymerase  
97 chain reaction (RT-PCR) positive report for COVID-19. Patients were diagnosed with  
98 COVID-19 using the RT-PCR tests conducted on samples collected either from a  
99 nasopharyngeal or oropharyngeal swab. We included all patients with ischemic or  
100 hemorrhagic strokes, and a combination of the two types (mixed group). We also included

101 three patients with associated additional cerebral venous sinus thrombosis (CVST) in this  
102 study, who presented with a focal deficit and had a cerebral arterial infarct on imaging. We  
103 included patients if the presentation was with the stroke and COVID-19 was detected later  
104 during admission, as well as if the stroke developed during admission for COVID-19 related  
105 respiratory symptoms. We did not include patients with a CVST without an arterial infarct or  
106 bleed associated, in this study, as we are maintaining a separate registry of COVID-19  
107 associated CVST at our center.

108 We noted the clinical, imaging and laboratory parameters in all patients, their respiratory  
109 status at admission, and the modes of supplementary oxygen that they required to maintain an  
110 oxygen saturation above 94% during hospital stay. The latter included, in order of increasing  
111 intensity, nasal cannula, venturi mask, non-rebreathing bag and mask (NRBM), high flow  
112 nasal cannula (HFNC), non-invasive ventilation (NIV), and intubation with mechanical  
113 ventilation. Two independent radiologists reviewed and opined on the images with reference  
114 to area of brain affected, vascular territory, and presence of large vessel occlusion (LVO) on  
115 CT angiography. LVO was stated to be present if Internal Carotid artery (ICA), Vertebral,  
116 Basilar, M1 or M2 segments of Middle Cerebral artery (MCA), Posterior Cerebral artery  
117 (PCA) or Anterior Cerebral artery (ACA), were occluded.

118 We documented the presence of existing comorbidities after checking previous medical  
119 records and ongoing medications prior to present admission. We classified patients who  
120 developed stroke symptoms either prior to or simultaneous with, or within 48 hours of  
121 respiratory symptom onset, as 'early stroke.'

122 We used Microsoft Excel (2010) to tabulate and clean the raw data, and to generate pivot  
123 tables and graphs. We imported the excel datasheet into SPSS version 20.0 (Armonk, NY:  
124 IBM Corp.) and performed univariate and multivariate analyses. We reported Mean  $\pm$   
125 Standard Deviation (SD) of key continuous variables. We divided the study set into

126 subgroups according to relevant characteristics and used the unpaired samples T-test and  
127 Fisher's exact test to study differences in continuous and categorical variables, respectively.  
128 We reported T tests with unequal variances assumed. We calculated 95% confidence  
129 intervals for mean differences and odds ratios. We considered a p value below 0.05 to be  
130 statistically significant if the 95% confidence intervals for the concerned test statistic were  
131 congruent. We performed a binary logistic regression analysis to determine predictors of in-  
132 hospital mortality. We entered the following variables as independent predictors: sex, age,  
133 Glasgow Coma Scale (GCS) score, type of stroke (infarct, bleed, mixed infarct and bleed,  
134 infarct with associated CVST, and strokes in which the type could not be determined,  
135 classified as indeterminate), type of onset of stroke (early/late), the number of comorbidities,  
136 the number of days that the patient was symptomatic prior to admission, the patient's oxygen  
137 saturation level on room air at the time of admission, and respiratory distress level (coded on  
138 an ascending scale reflecting the intensity of mode of supplementary oxygen delivery, where  
139 0 represented no support required, and 6 represented invasive ventilation).

140 We included all the stroke cases in our analysis for prediction of in-hospital mortality, and  
141 separately analyzed arterial infarcts (pure infarcts, and the infarct component from the mixed  
142 and CVST groups) for vascular territory of ischemic strokes.

143 **Ethical considerations:** The Human Research Institutional Ethics Committee of Lokmanya  
144 Tilak Municipal Medical College and General Hospital Mumbai, Maharashtra, India,  
145 reviewed the study and granted it scientific and ethical approval.

146 **Data availability statement:** The data used in our analysis will be made available to  
147 researchers upon reasonable request to the corresponding author.

148 **Results:**

149 During the period 1 March to 31 October 2020, there were 3923 COVID-19 admissions to the  
150 medicine department at our center. Since ours is a tertiary care hospital, only patients  
151 requiring oxygen support, or with any organ dysfunction, were admitted.

152 We had 62 stroke admissions during this period, giving an incidence of 1.6%. We were able  
153 to collect detailed data for 58 out of these 62 patients (two patients had moved away to their  
154 village and were untraceable after discharge, and two did not revert to our communication).

155 Table 1 shows the summarized clinical and laboratory findings for the cases. The mean age  
156 was 52.6 years (range 17–91), with 20 out of 58 patients being women. The age and sex  
157 distribution of the cases is shown in Figure 1. We had 14 patients (21% of 58) aged 40 years  
158 or less, classified as ‘young strokes.’ Comorbidities taken into account were pre-existing  
159 hypertension, diabetes mellitus, ischemic heart disease and chronic renal disease.

160 Hypertension was present in 51% (30/58) and Diabetes in 36% (21/58) patients. Among the  
161 58 patients, 35% (20/58) had no comorbidities, 36% (21/58) had a single comorbidity and  
162 29% (17/58) had two or more comorbidities.

163 Among 58 strokes, 44 were pure arterial infarcts, seven were arterial bleeds, two were mixed  
164 (arterial infarct plus bleed), three had associated cerebral venous sinus thrombosis (CVST)  
165 with cortical infarcts in the carotid territory (a total of 49 out of 58 patients thus had arterial  
166 infarcts), and two were indeterminate (Figure 2A). These last were both bithalamic infarcts,  
167 possibly due to blockage of artery of Percheron or vein of Galen. As CT angiography and  
168 venography were not available for these two patients, they have been classified as of  
169 indeterminate etiology.

170 Among the 49 patients with ischemic strokes either in isolation or in combination with CVST  
171 or arterial bleed, 36 patients (36/49; 73.5%) had infarcts in the carotid territory, seven (7/49;  
172 14.3%) in the vertebrobasilar territory, and six patients (6/49; 12.2%) had infarcts in both  
173 territories. Among the carotid ischemic strokes (total 42), 39 scans were available for analysis

174 for type of carotid territory infarct. Among these, 16 were large hemispherical, 10 were  
175 subcortical and 13 were pure cortical. A concordant arterial block was seen in 61% (19/31) of  
176 the infarcts which had angiography done. The commonest vessels occluded were MCA main  
177 stem (6/19), ICA extending into MCA (5/19), and ICA alone (3/19). (Figure 2B)

178 In this series, 82.7% (48/58) patients had an 'early stroke,' defined as development of stroke  
179 symptoms either prior to or simultaneous with, or within 48 hours of respiratory symptom  
180 onset. We noted 22/58 patients (37.9%) who presented to the emergency room with the  
181 stroke, with no other associated respiratory or systemic symptoms. A comparative analysis of  
182 patients with early versus late stroke, is shown in Supplementary Table S1.

183 Sixteen of 58 (28%) patients had already had over 72 hours of respiratory symptoms at home  
184 before presentation. Six of these patients had stroke symptoms in addition, at home, but still  
185 presented 72 hours or later after their first symptom. On analysis of these six patients, four  
186 had a lacunar syndrome and four had GCS between 9 and 13 at admission.

187 In this series, 34/58 (58.6%) patients had normal oxygen saturation on room air (95% and  
188 above) at presentation. There were 22/58 patients (37.9 %) with no respiratory symptoms  
189 either, at presentation, with normal saturation on room air in casualty. Among the 34 patients  
190 who had good oxygen saturation at admission, 22 continued to remain on room air, four went  
191 on to nasal cannula at 4–5 liters/minute, one received venturi mask support at 8 liters/minute,  
192 one through NRBM at 15 liters/minute, four received oxygen through NIV with average  
193 positive end-expiratory pressure (PEEP) at 7 cm water, and two required intubation and  
194 ventilation. Among the 24 patients who had poor oxygen saturation at admission, eight went  
195 on to nasal cannula at 4–5 liters/minute, five received venturi mask support at 8 liters/minute,  
196 one through NRBM at 15 liters/minute, one through HFNC at up to 60 liters/minute, eight  
197 received oxygen through NIV at average PEEP 7 cm water, and one required intubation and  
198 ventilation. Mortality in the former group was 38.2% and in the latter, 79.1%; a significant



199 difference. Comparison between these two groups (Table 2) showed that patients in the group  
200 with poor saturation at admission were significantly older, and fewer of them were free of  
201 comorbidities (20.8% vs 44.1% of patients with good saturation; although this was not  
202 statistically significant).

203 Compared to younger patients, 40 years and under (24%; 14/58), older patients with stroke in  
204 COVID-19 did not have notably higher mortality (Table 3). More of the older patients, as  
205 expected, had associated comorbidities. Concordant arterial block (analyzed in a subset of 31  
206 patients who had CT angiography reports available), was significantly commoner in the  
207 younger group (100% in younger group vs 43% in older group). A larger proportion of the  
208 younger patients, as compared to the older group, had normal oxygen saturation at admission.  
209 In fact, 13/14 (92.8%) ‘young strokes’ did not progress beyond low flow systems (up to  
210 venturi mask) in supplementary oxygen requirements during admission, whereas 17/44  
211 (38.6%) older patients required respiratory support with NRBM, HFNC, NIV, or intubation  
212 with mechanical ventilation. In contrast, the mortality was similar in both the groups (50% in  
213 young strokes vs 56.8% in older strokes).

214 In our series, 47/58 patients were admitted after the beginning of July, when Remdesivir  
215 injections became available to us. Patients with significant hypoxia, within 10 days of onset  
216 of the first symptom of COVID-19, and with a normal creatinine clearance, qualified for  
217 Remdesivir therapy. In this series, 19 of 47 patients received Remdesivir. Similarly,  
218 Tocilizumab was available to us from early May (52 patients were admitted after this point),  
219 and was administered to patients with a diagnosis of cytokine storm, as judged by persistent  
220 hypoxia with diffuse lung involvement on CT chest, and raised inflammatory markers. In this  
221 series, 7 of 52 patients received 400 mg of intravenous Tocilizumab. However, neither  
222 Remdesivir nor Tocilizumab showed correlation with in-hospital survival in this series  
223 (Supplementary Tables S2 and S3 respectively).

224 Figure 3 shows the timeline of stroke admissions in our series, in relation to overall COVID-  
225 19 admissions from March to October 2020. Whereas there was a fall in COVID-19 cases  
226 and flattening of the curve from August onwards, the maximum number of stroke admissions  
227 (32/58) were in September and October 2020.

228 In-hospital mortality rate was 32/58 (55.17 %). Mortality among younger patients ( $\leq 40$  yrs)  
229 was 7/14 (50%). Binary logistic regression (Table 4) showed level of need for respiratory  
230 support and GCS at admission to be independent predictors of mortality. Progression to more  
231 intense modes of support correlated positively with mortality, and higher GCS at admission  
232 correlated negatively. “Early Stroke” did not achieve significance in relation to mortality in  
233 binary or multivariate analyses.

#### 234 **Discussion:**

235 Our incidence of acute stroke during COVID-19 is 1.6%. However, this is probably an  
236 underestimation. In the months of March and April 2020, we did not recognize that stroke  
237 could be the first presentation of COVID-19. Hence, if the systemic or respiratory  
238 involvement was mild or absent in COVID related strokes in the early months, the cases  
239 could have been missed. Additionally, logistical problems of testing in the early months  
240 contributed to the underestimation. We have not included cerebral venous sinus thrombosis in  
241 this study, as mentioned, except in three cases where CVST was found on imaging in  
242 association with a carotid territory infarct. The incidence of stroke in COVID-19 in other  
243 reported studies ranged from 0.6% to 6%.(1–5,10–17) This wide range of reported incidence  
244 is due to differing nature of data collection at different centers, with some studies reporting  
245 only specific subtypes of strokes, and some others considering only severe cases of COVID-  
246 19 for evaluation.

247 We classified the strokes as presenting early, or late, in relation to the first systemic symptom  
248 of fever or respiratory complaints. This was to estimate the proportion of patients who had a

249 neurological presentation of COVID-19. In our series, 83% of patients with stroke had the  
250 neurological symptoms within 48 hours of the first systemic/respiratory complaint. In fact, 22  
251 patients (22/58; 37.9 %) had a pure neurological presentation, with no respiratory or systemic  
252 symptoms at admission. This very early thromboembolic or hemorrhagic presentation argues  
253 for a high thrombo-inflammatory pathology in these patients. In a meta-analysis of 28 articles  
254 related to stroke and COVID-19, the average number of days to develop stroke among  
255 patients after the onset of COVID-19 infection was  $6.9 \pm 4.5$  days.(6) Some series, similar to  
256 our data, have reported that patients may present with stroke with simultaneous asymptomatic  
257 COVID-19 infection.(11,17) In concordance with stroke data in non-COVID-19 times, and  
258 with data published on stroke in COVID-19, the vast majority of our CVAs were  
259 infarcts.(13,15–17) The majority were in the Carotid territory. Over two thirds of the patients  
260 who had an angiography done, showed concordant arterial blocks in the large vessels, MCA  
261 main stem being the commonest vessel occluded. In the meta-analysis by Wei Lee et al.(6)  
262 and in various studies,(3,11,17) occluded vessels involved were M1 vessels, M2 vessels,  
263 internal carotid, multi-territorial, posterior cerebral, basilar, ACA, and the vertebral artery.  
264 Mohamud et al have also raised the issue of Internal Carotid thrombosis in COVID-19  
265 associated stroke being linked to cytokine storm.(18)

266 Although echocardiography is a mandatory investigation in acute ischemic stroke, we could  
267 not perform this test in our patients due to logistical problems of transporting COVID-19  
268 patients for tests, and not having a dedicated machine for echocardiography in the COVID-19  
269 wards. We plan to do echocardiography in stable patients on follow up, after they are  
270 COVID-19 negative. The elucidation of mechanism of ischemic stroke requires  
271 determination of area of infarct, followed by, if required, angiography, echocardiography,  
272 prolonged Holter monitoring and tests of coagulation if deemed necessary. During the  
273 COVID-19 pandemic, it is not possible to do many of these tests in a resource challenged

274 setting, and the stroke may hence be labelled ‘cryptogenic,’ as investigations are limited.

275 Yaghi et al, comparing COVID positive and COVID negative strokes, reported a higher

276 incidence of both LVO and cryptogenic strokes among the former.(13)

277 Among our patients, 24% were 40 years of age or under. They had significantly fewer

278 comorbidities and higher oxygen saturation at admission, as compared to the older group.

279 Mortality was, however, similar in both groups, possibly contributed to by the significantly

280 higher proportion of proximal vessel occlusion in the younger group (100% in the young

281 group, vs 43% in the older group, in the patients who had a CT angiography done). This

282 could have led to rapidly worsening stroke and subsequent mortality, despite mild respiratory

283 illness. This is borne out by the fact that 13/14 of these young strokes had a mild respiratory

284 involvement, never requiring supplementary oxygen beyond venturi mask support. It is

285 possible that some of these young patients had tobacco or alcohol abuse as a risk factor for

286 stroke in the background. We do not have uniform data on tobacco and alcohol addiction

287 among our patients, hence these were not considered in the analysis. Various studies have

288 noted the association of COVID-19 with stroke in the young.(6,11,17,19) Belani et al have

289 reported a 7-fold increase in the rate of large vessel stroke in young people compared with the

290 previous year, in New York city, associated with a hypercoagulable state , due to COVID-

291 19.(20)

292 On comparing the patients who were admitted with a normal oxygen saturation with those

293 who had a low saturation at admission, we found significantly more patients with higher

294 mean age in the latter group, possibly leading to the higher mortality in this group. However,

295 subtype of stroke, level of inflammatory markers and presence of comorbidities were similar

296 in both groups. (Table 2)

297 Although a large proportion of our patients presented after both Remdesivir and Tocilizumab

298 became available to us for treatment, the addition of these did not appear to improve survival.

299 Remdesevir, which has been shown to reduce hospitalization time in COVID-19 with lower  
300 respiratory involvement,(21) is unlikely to have much effect on the course of stroke in  
301 COVID-19, which is multifactorial and complex in etiopathogenesis. Tocilizumab, which  
302 binds specifically to both soluble and membrane-bound interleukin-6 receptors, is used in the  
303 management of COVID-19 associated cytokine storm; however, whether it independently  
304 results in survival benefit in severe COVID-19, is a matter for debate.(22,23) Although  
305 cytokine storm has been proposed as an etiological factor in stroke in COVID-19, it is only  
306 one of many proposed factors.

307 Since our hospital admits only the patients requiring a higher level of care, the curve of  
308 overall COVID-19 admissions specifically reflects the most severe cases only (Figure 3).  
309 Within this category, it is clear that the incidence of stroke increased as the number of severe  
310 admissions fell, during August to October 2020. The explanation for this is unclear—it is  
311 possible that the virus had a higher thromboinflammatory effect during this period, or  
312 possibly some of the patients may have been reinfected after a previous mild illness and  
313 recovery; patients and relatives could also have been more amenable to coming for admission  
314 for stroke as the number of cases declined overall in the city.

315 In this series, 55% of patients expired in hospital. We found lower GCS score at admission  
316 to be an independent predictor of in-hospital mortality in stroke with COVID-19, as expected,  
317 signifying a worse stroke. Requirement for higher levels of respiratory support also predicted  
318 mortality, signifying more severe respiratory and neurological illness overall. Early onset of  
319 stroke, longer duration of symptoms at home before presenting to hospital, and oxygen  
320 saturation at admission showed no correlation with in-hospital mortality. In three studies  
321 comparing stroke in COVID-19 patients with stroke in non-COVID-19 patients, mortality  
322 was higher in all three cohorts among patients with COVID-19 infection; Benussi et al.(16)  
323 reporting 34.9% vs. 5.9%, Yaghi et al.(13) reporting 63.6% vs. 9.3%, and Escalard et al.(24)

324 reporting 60.0% vs. 11.0%, respectively. Taylor et al reported a mortality of 46% among their  
325 patients, with a high percentage of proximal LVOs.(25)

326 We faced many management dilemmas during the treatment of these 58 patients. In the initial  
327 months, patients would not be brought on time, or not brought at all to hospital, due to fear of  
328 COVID-19 among relatives. Although six patients were brought in the golden period for  
329 intravenous thrombolysis, and one developed ischemic stroke while in the ward, intravenous  
330 thrombolysis was not possible in any of them due to various factors—severe respiratory  
331 disease, or severe stroke, and in one case, absence of relatives to sign consent, due to  
332 quarantine. We detected only a single patient with platelet count below 50000/ c mm during  
333 admission, in our study. Hence, apprehensions about thrombocytopenia should probably not  
334 hinder the decision to thrombolysse immediately, if the patient meets criteria for intravenous  
335 thrombolysis.

336 We follow a policy of anticoagulation with Heparin during admission, in all patients with  
337 moderate to severe COVID-19 requiring oxygen supplementation, who have raised d Dimer  
338 over twice normal levels. Similarly, we discharge moderate to severe COVID-19 patients on  
339 oral anticoagulants, to be taken for 4-6 weeks, to prevent thromboembolic episodes, in line  
340 with current guidelines.(26,27) In the presence of a large infarct with attendant advanced age  
341 or uncontrolled hypertension, there is a risk of a secondary bleed into the infarct while on  
342 Heparin. We decided the dose and type of Heparin during hospital stay, and the oral  
343 anticoagulant at discharge, on a case to case basis. We prescribed a single antiplatelet at  
344 discharge in addition to the oral anticoagulant, in the majority of our patients. Treatment of  
345 COVID positive ischemic stroke, in the available literature, has ranged from mechanical  
346 thrombectomy in very stable patients, to standard oral antiplatelet therapy,(3,24,28,29)  
347 reflecting the wide variability in severity of stroke as well as respiratory illness, in them.

348 In conclusion, we had an incidence of 1.6%, of COVID-19 related stroke in our center. Of  
349 these 84% were infarcts, with the majority being in the Carotid territory. Young strokes  
350 comprised 24% of the patients. Concordant arterial occlusion was seen in 61% of the patients  
351 who had an angiography done, and was significantly more frequent in younger patients  
352 compared to older patients, in our study group. In-hospital mortality was 55.17% and was  
353 predicted by a low GCS at admission and higher levels of respiratory support required to  
354 maintain saturation. Management dilemmas included the role of anticoagulation during  
355 admission and at discharge, taking into account the importance of preventing further  
356 thromboembolic complications vs the risk of secondary bleeding into large infarcts.

357 **Sources of Funding:** None

358 **Disclosures:** None

359

360 **References:**

- 361 1. Correia AO, Feitosa PWG, Moreira JL de S, Nogueira SÁR, Fonseca RB, Nobre MEP.  
362 Neurological manifestations of COVID-19 and other coronaviruses: A systematic  
363 review. *Neurol Psychiatry Brain Res.* 2020 Sep;37:27–32.
- 364 2. Ellul MA, Benjamin L, Singh B, Lant S, Michael BD, Easton A, et al. Neurological  
365 associations of COVID-19. *Lancet Neurol.* 2020;19(9):767–83.
- 366 3. Oxley TJ, Mocco J, Majidi S, Kellner CP, Shoirah H, Singh IP, et al. Large-Vessel  
367 Stroke as a Presenting Feature of Covid-19 in the Young. *N Engl J Med.* 2020  
368 14;382(20):e60.
- 369 4. Mao L, Jin H, Wang M, Hu Y, Chen S, He Q, et al. Neurologic Manifestations of  
370 Hospitalized Patients With Coronavirus Disease 2019 in Wuhan, China. *JAMA Neurol.*  
371 2020 01;77(6):683–90.

- 372 5. Khandelwal P, Mufti FA, Tiwari AT, Singla A, Dmytriw A, Piano M, et al. Incidence,  
373 Characteristics and Outcomes of Large Vessel Stroke in COVID-19 Cohort: A  
374 Multicentric International Study. [Internet]. Rochester, NY: Social Science Research  
375 Network; 2020 Jun [cited 2020 Dec 1]. Report No.: ID 3617195. Available from:  
376 <https://papers.ssrn.com/abstract=3617195>
- 377 6. Lee KW, Yusof Khan AHK, Ching SM, Chia PK, Loh WC, Abdul Rashid AM, et al.  
378 Stroke and Novel Coronavirus Infection in Humans: A Systematic Review and Meta-  
379 Analysis. *Front Neurol.* 2020;11:579070.
- 380 7. Hamming I, Timens W, Bulthuis MLC, Lely AT, Navis GJ, van Goor H. Tissue  
381 distribution of ACE2 protein, the functional receptor for SARS coronavirus. A first step  
382 in understanding SARS pathogenesis. *J Pathol.* 2004 Jun;203(2):631–7.
- 383 8. Moore HB, Barrett CD, Moore EE, McIntyre RC, Moore PK, Talmor DS, et al. Is there  
384 a role for tissue plasminogen activator as a novel treatment for refractory COVID-19  
385 associated acute respiratory distress syndrome? *J Trauma Acute Care Surg.*  
386 2020;88(6):713–4.
- 387 9. Chen G, Wu D, Guo W, Cao Y, Huang D, Wang H, et al. Clinical and immunological  
388 features of severe and moderate coronavirus disease 2019. *J Clin Invest.* 2020  
389 01;130(5):2620–9.
- 390 10. Lodigiani C, Iapichino G, Carenzo L, Cecconi M, Ferrazzi P, Sebastian T, et al. Venous  
391 and arterial thromboembolic complications in COVID-19 patients admitted to an  
392 academic hospital in Milan, Italy. *Thromb Res.* 2020;191:9–14.
- 393 11. Avula A, Nalleballe K, Narula N, Sapozhnikov S, Dandu V, Toom S, et al. COVID-19  
394 presenting as stroke. *Brain Behav Immun.* 2020;87:115–9.



- 395 12. Klok FA, Kruip MJHA, van der Meer NJM, Arbous MS, Gommers D a. MPJ, Kant  
396 KM, et al. Incidence of thrombotic complications in critically ill ICU patients with  
397 COVID-19. *Thromb Res.* 2020;191:145–7.
- 398 13. Yaghi S, Ishida K, Torres J, Mac Grory B, Raz E, Humbert K, et al. SARS-CoV-2 and  
399 Stroke in a New York Healthcare System. *Stroke.* 2020;51(7):2002–11.
- 400 14. Helms J, Tacquard C, Severac F, Leonard-Lorant I, Ohana M, Delabranche X, et al.  
401 High risk of thrombosis in patients with severe SARS-CoV-2 infection: a multicenter  
402 prospective cohort study. *Intensive Care Med.* 2020;46(6):1089–98.
- 403 15. Xiong W, Mu J, Guo J, Lu L, Liu D, Luo J, et al. New onset neurologic events in people  
404 with COVID-19 in 3 regions in China. *Neurology.* 2020 15;95(11):e1479–87.
- 405 16. Benussi A, Pilotto A, Premi E, Libri I, Giunta M, Agosti C, et al. Clinical characteristics  
406 and outcomes of inpatients with neurologic disease and COVID-19 in Brescia,  
407 Lombardy, Italy. *Neurology.* 2020 18;95(7):e910–20.
- 408 17. Fara MG, Stein LK, Skliut M, Morgello S, Fifi JT, Dhamoon MS. Macrothrombosis and  
409 stroke in patients with mild Covid-19 infection. *J Thromb Haemost.* 2020  
410 Aug;18(8):2031–3.
- 411 18. Mohamud AY, Griffith B, Rehman M, Miller D, Chebl A, Patel SC, et al. Intraluminal  
412 Carotid Artery Thrombus in COVID-19: Another Danger of Cytokine Storm? *AJNR*  
413 *Am J Neuroradiol.* 2020;41(9):1677–82.
- 414 19. Zhang Y, Xiao M, Zhang S, Xia P, Cao W, Jiang W, et al. Coagulopathy and  
415 Antiphospholipid Antibodies in Patients with Covid-19. *N Engl J Med.* 2020 Apr  
416 8;382(17):e38.
- 417 20. Belani P, Schefflein J, Kihira S, Rigney B, Delman BN, Mahmoudi K, et al. COVID-19  
418 Is an Independent Risk Factor for Acute Ischemic Stroke. *AJNR Am J Neuroradiol.*  
419 2020;41(8):1361–4.

- 420 21. Beigel JH, Tomashek KM, Dodd LE, Mehta AK, Zingman BS, Kalil AC, et al.  
421 Remdesivir for the Treatment of Covid-19 - Final Report. *N Engl J Med*. 2020  
422 05;383(19):1813–26.
- 423 22. Stone JH, Frigault MJ, Serling-Boyd NJ, Fernandes AD, Harvey L, Foulkes AS, et al.  
424 Efficacy of Tocilizumab in Patients Hospitalized with Covid-19. *N Engl J Med*. 2020  
425 21;
- 426 23. Guaraldi G, Meschiari M, Cozzi-Lepri A, Milic J, Tonelli R, Menozzi M, et al.  
427 Tocilizumab in patients with severe COVID-19: a retrospective cohort study. *Lancet*  
428 *Rheumatol*. 2020 Aug;2(8):e474–84.
- 429 24. Escalard S, Maïer B, Redjem H, Delvoe F, Hébert S, Smajda S, et al. Treatment of  
430 Acute Ischemic Stroke due to Large Vessel Occlusion With COVID-19: Experience  
431 From Paris. *Stroke*. 2020;51(8):2540–3.
- 432 25. Taylor BES, Khandelwal P, Rallo MS, Patel P, Smith L, Sun H, et al. Outcomes and  
433 Spectrum of Major Neurovascular Events Among COVID-19 Patients: A 3-Center  
434 Experience. *Neurosurgery Open* [Internet]. 2020 Sep [cited 2020 Dec 1];1(3). Available  
435 from: <https://www.ncbi.nlm.nih.gov/pmc/articles/PMC7454798/>
- 436 26. Flaczyk A, Rosovsky RP, Reed CT, Bankhead-Kendall BK, Bittner EA, Chang MG.  
437 Comparison of published guidelines for management of coagulopathy and thrombosis in  
438 critically ill patients with COVID 19: implications for clinical practice and future  
439 investigations. *Crit Care*. 2020 16;24(1):559.
- 440 27. Chowdhury JF, Moores LK, Connors JM. Anticoagulation in Hospitalized Patients with  
441 Covid-19. *N Engl J Med*. 2020 Oct 22;383(17):1675–8.
- 442 28. TunÇ A, ÜnlÜbaŞ Y, Alemdar M, AkyÜz E. Coexistence of COVID-19 and acute  
443 ischemic stroke report of four cases. *J Clin Neurosci*. 2020 Jul;77:227–9.

444 29. Qureshi AI, Abd-Allah F, Al-Senani F, Aytac E, Borhani-Haghighi A, Ciccone A, et al.  
445 Management of acute ischemic stroke in patients with COVID-19 infection: Insights  
446 from an international panel. Am J Emerg Med. 2020;38(7):1548.e5-1548.e7.

447

448

449

450

451

452

453

454

455

456

457

458

459

460

461 **Tables:**

462 Table 1 COVID-19 with Stroke: Overall Data

| Parameter                | Mean±SD       | Range        |
|--------------------------|---------------|--------------|
| Age                      | 52.6±15.47    | 17–91        |
| GCS score                | 9.31±4.08     | 3–15         |
| SpO2 at admission        | 89.16±13.30   | 46–99        |
| Platelet count/μL (n=53) | 220718±106107 | 20100–607000 |

|                                  |                         |              |
|----------------------------------|-------------------------|--------------|
| CRP mg/L (n=31)                  | 61.88±58.23             | 2.8–229      |
| D Dimer ng/mL (n=27)             | 2796.3±2389.6           | 335–10000    |
| D Dimer nmol/L (n=27)            | 30.62±26.17             | 3.67–109.52  |
| S. Creatinine mg/dL (n=54)       | 1.22±0.70               | 0.4–5.2      |
| S. Creatinine μmol/L (n=54)      | 107.88±61.47            | 35.36–459.68 |
| Gender ratio M/F (%)             | 38/20 (66:34)           |              |
| Pts with ≥1 comorbidity (%)      | 38/58 (65)              |              |
| Infarcts/Pure Bleeds (% of 58)   | 49/7 (84/12)            |              |
| Carotid/Vertebrobasilar/Both (%) | 36/7/6 (73.4/14.3/12.3) |              |
| Proximal arterial block (%)      | 19/31 (61)              |              |
| SpO2 < 95% at admission (%)      | 24/58 (41)              |              |
| Mortality (%)                    | 32/58 (55.17)           |              |

463 CRP: C Reactive Protein

464

465

466

467 Table 2 COVID-19 associated stroke patients with good saturation\* at admission compared

468 to those with low saturation.

| Parameter                | Good saturation<br>n=34 | Poor saturation<br>n=24 | P value | Test statistic (95% CIs)            |
|--------------------------|-------------------------|-------------------------|---------|-------------------------------------|
| Pure Ischemia/Pure Bleed | 24/5                    | 20/2                    |         |                                     |
| Mean Age                 | 48.62                   | 58.25                   | .016    | -9.63 <sup>†</sup> (-17.39 – -1.87) |

|                                  |           |           |      |                                      |
|----------------------------------|-----------|-----------|------|--------------------------------------|
| Mean GCS                         | 9.41      | 9.17      | .826 | 0.24 <sup>†</sup> (-1.99 – 2.48)     |
| Mean D Dimer nmol/L <sup>§</sup> | 28.13     | 33.74     | .596 | -5.60 <sup>‡</sup> (-27.22 – 16.01)  |
| Mean CRP mg/L <sup>  </sup>      | 49.15     | 77.35     | .207 | -28.20 <sup>‡</sup> (-73.29 – 16.88) |
| Large hemispherical infarcts     | 9/34      | 7/24      | .999 | 0.87 <sup>‡</sup> (0.27 – 2.80)      |
| Comorbidities $\geq$ 1           | 19/34     | 19/24     | .094 | 0.33 <sup>‡</sup> (0.10 – 1.10)      |
| Mortality (%)                    | 13 (38.2) | 19 (79.2) | .003 | 0.16 <sup>‡</sup> (0.05 – 0.54)      |

469 \*SpO<sub>2</sub>>95 % on room air; † Test statistic: Mean difference; ‡ Test statistic: Odds ratio; § D

470 Dimer values available for 15 patients with good saturation and 12 with poor saturation; ||

471 CRP values available for 17 patients with good saturation and 14 with poor saturation; CRP:

472 C Reactive Protein

473

474

475

476

477

478

479

480

481 Table 3 Young strokes\* in COVID-19: a comparison with older strokes

| Parameter                | Young<br>(n=14) | Older<br>(n=44) | P<br>Value | Test statistic (95% CIs)              |
|--------------------------|-----------------|-----------------|------------|---------------------------------------|
| Pure Ischemia/Pure Bleed | 10/1            | 34/6            |            |                                       |
| Mean Age                 | 31.79           | 59.23           | .000       | -27.44 <sup>†</sup> (-32.41 – -22.48) |
| Mean GCS                 | 9.93            | 9.11            | .516       | 0.81 <sup>†</sup> (-1.74 – 3.37)      |

|                                        |          |           |      |                                      |
|----------------------------------------|----------|-----------|------|--------------------------------------|
| Mean D Dimer nmol/L <sup>§</sup>       | 49.03    | 26.44     | .215 | 22.59 (-18.43 – 63.60)               |
| Mean CRP mg/L <sup>  </sup>            | 47.87    | 65.25     | .560 | -17.38 <sup>†</sup> (-84.38 – 49.61) |
| Mean SpO2 at admission                 | 96.71    | 86.75     | .000 | 9.96 <sup>†</sup> (5.47 – 14.45)     |
| Large hemispherical infarcts           | 5/14     | 11/44     | .500 | 1.67 <sup>‡</sup> (0.46 – 6.05)      |
| Comorbidities ≥1                       | 3/14     | 35/44     | .000 | 0.07 <sup>‡</sup> (0.02 – 0.31)      |
| Concordant arterial block <sup>#</sup> | 10/10    | 9/21      | .004 | NA (denominator 0)                   |
| Respiratory support ≥NRBM              | 1/14     | 17/44     | .044 | 0.12 <sup>‡</sup> (0.01 – 1.02)      |
| Mortality (%)                          | 7 (50.0) | 25 (56.8) | .761 | 0.76 <sup>‡</sup> (0.23 – 2.54)      |

482 \* Age ≤40; † Test statistic: Mean difference; ‡ Test statistic: Odds ratio; § D Dimer values  
 483 available for 5 young strokes and 22 older patients; || CRP values available for 6 young  
 484 strokes and 25 older patients; # 31 CT angiographies done; CRP: C Reactive Protein

485

486

487

488

489

490

491

492 Table 4 Predictors of In-hospital Mortality in COVID-19

|                     | B     | Exp(B) | 95% C.I. for EXP(B) |       | Sig. |
|---------------------|-------|--------|---------------------|-------|------|
|                     |       |        | Lower               | Upper |      |
| Sex (M)             | 0.03  | 1.03   | 0.15                | 7.02  | .975 |
| Age                 | -0.04 | 0.96   | 0.90                | 1.03  | .259 |
| Respiratory support | 1.01  | 2.75   | 1.15                | 6.57  | .022 |

|                          |       |           |      |        |      |
|--------------------------|-------|-----------|------|--------|------|
| intensity                |       |           |      |        |      |
| Duration of symptoms     | -0.13 | 0.88      | 0.77 | 1.01   | .060 |
| GCS score                | -0.37 | 0.69      | 0.54 | 0.89   | .004 |
| SpO2 at Admission        | -0.06 | 0.94      | 0.86 | 1.04   | .234 |
| Stroke type (ref. bleed) |       |           |      |        | .722 |
| Infarct                  | -1.17 | 0.31      | 0.02 | 4.36   | .385 |
| Infarct+Bleed            | 0.23  | 1.25      | 0.00 | 350.03 | .937 |
| Infarct+CVST             | -4.07 | 0.02      | 0.00 | 10.74  | .216 |
| Indeterminate            | 19.07 | 1.91e08   | 0.00 |        | .999 |
| Early onset stroke       | -1.00 | 0.37      | 0.02 | 5.79   | .477 |
| No. of comorbidities     | 0.23  | 1.26      | 0.44 | 3.63   | .666 |
| Constant                 | 11.75 | 126808.17 |      |        | .044 |

493 CVST: Cerebral Venous Sinus Thrombosis

494

495

496

497

498

499 **Figures:**

500 Figure 1 Age-Sex Distribution of COVID Stroke Cases

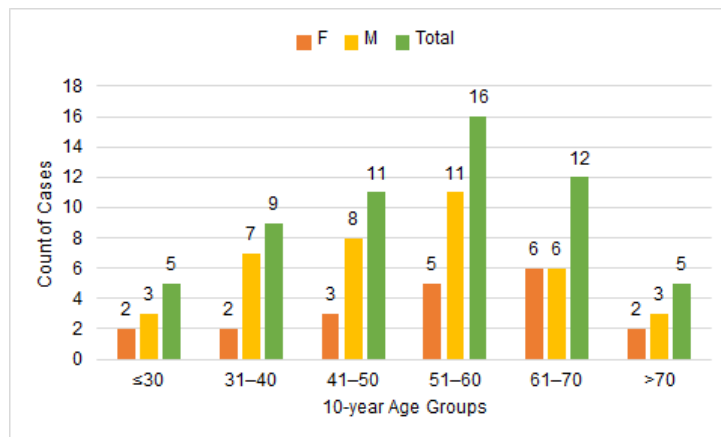

501

502

503

504

505

506

507

508

509

510

511

512

513

514

515

516

517

518 Figure 2A: Types of Stroke in COVID Stroke Patients and 2B: Large Vessel Occlusion

519 Types among Arterial Infarcts



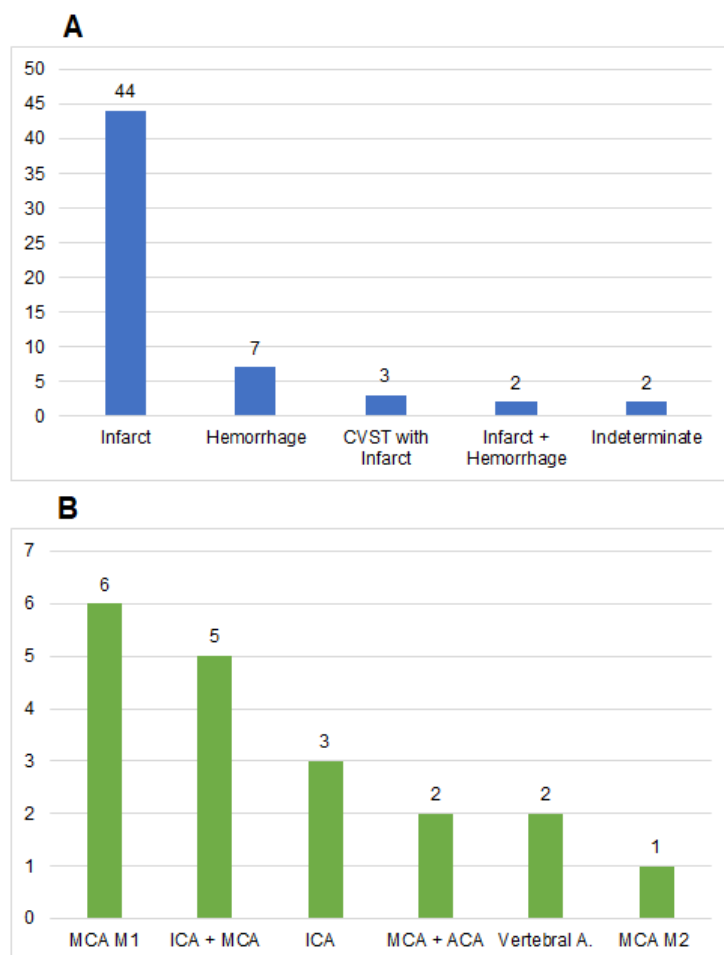

520

521 CVST: Cerebral Venous Sinus Thrombosis; MCA M1: M1 segment of Middle Cerebral  
522 artery; ICA: Internal Carotid artery; ACA: Anterior Cerebral artery; MCA M2: M2 segment  
523 of Middle Cerebral artery. CT Angiographies done in 31 of whom 19 had concordant arterial  
524 blocks.

525

526

527

528

529 Figure 3: Time Trend of COVID Stroke Cases vs Total COVID-19 Admissions to

530 Internal Medicine

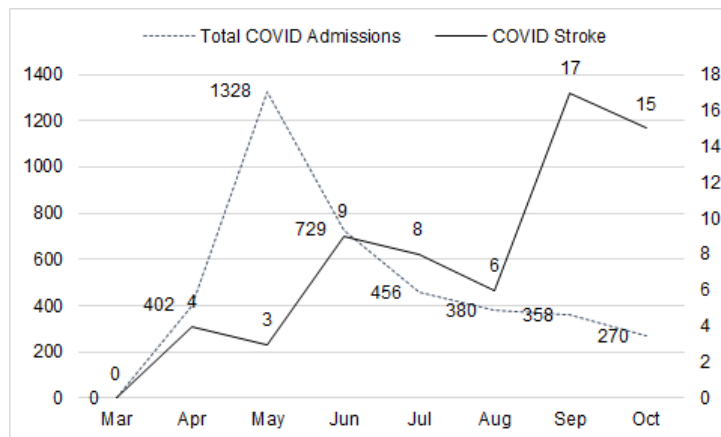

531

532

533

534

535

536

537

538

539

540

541

542

543

544

545

546

547

548

549

550

*COVID-19 Associated Stroke—A Single Centre Experience*

551

552 Uma Sundar, Niteen D Karnik, Amita Mukhopadhyay, Pramod Darole, Shaonak  
553 Kolte, Ashank Bansal, Yojana A Gokhale, Dnaneshwar Asole, Anagha Joshi, Sangeeta  
554 Pednekar, Swati Chavan, Trupti Trivedi, Namita Padwal, Lalana Kalekar, Charulata  
555 Londhe, Rupal Padhiyar, Dharmendra Pandey, Dhirendra Yadav, Sonal U Honrao, Prerana  
556 Bhavsar, Priyanshu Shah, Satish Gosavi, Aniket Wadal, Awesh P Shingare, Mayuri Trivedi,  
557 Gauri Pathak Oak.

558

559 **SUPPLEMENTARY MATERIAL**

560 *Table of Contents*

|     |                                                                                                 |    |
|-----|-------------------------------------------------------------------------------------------------|----|
| 561 | <b>Supplementary Tables:</b> .....                                                              | 28 |
| 562 | Table S1 COVID-19 associated stroke patients with early stroke vs. those with late stroke ..... | 28 |
| 563 | Table S2 Analysis of patients admitted after Remdesivir became available .....                  | 29 |
| 564 | Table S3 Analysis of patients admitted after Tocilizumab became available.....                  | 30 |

565

566

567

568

569

570

571

### Supplementary Tables:

572

Table S1 COVID-19 associated stroke patients with early stroke vs. those with late stroke

573

| Parameter                        | Early stroke*<br>n=48 | Late stroke<br>n=10 | P<br>value | Test statistic (95% CIs)           |
|----------------------------------|-----------------------|---------------------|------------|------------------------------------|
| Pure Ischemia/Pure Bleed         | 36/6                  | 8/1                 |            |                                    |
| Mean Age                         | 52.79                 | 51.70               | .832       | 1.09 <sup>†</sup> (-9.73 – 11.91)  |
| Mean GCS                         | 9.44                  | 8.70                | .638       | 0.74 <sup>†</sup> (-2.59 – 4.06)   |
| Mean D Dimer nmol/L <sup>§</sup> | 30.71                 | 29.98               | .962       | 0.73 <sup>†</sup> (-45.18 – 46.63) |
| Mean CRP mg/L <sup>  </sup>      | 67.62                 | 38.00               | .051       | 29.62 <sup>†</sup> (-0.07 – 59.31) |
| Large hemispherical<br>infarcts  | 14/48                 | 2/10                | .710       | 1.65 <sup>‡</sup> (0.31 – 8.75)    |
| Comorbidities $\geq$ 1           | 31/48                 | 7/10                | .999       | 0.78 <sup>‡</sup> (0.18 – 3.42)    |
| Mortality (%)                    | 27/48 (56.2)          | 5/10 (50.0)         | .740       | 1.29 <sup>‡</sup> (0.33 – 5.03)    |

574

\*Stroke developed prior to, simultaneous with or within 48 hours after respiratory symptoms;

575

<sup>†</sup> Test statistic: Mean difference; <sup>‡</sup> Test statistic: Odds ratio; <sup>§</sup> D Dimer values available for

576

24 early strokes and 3 late strokes; <sup>||</sup> CRP values available for 25 early strokes and 6 late

577

strokes.

578

579

580

581

582

583

584

585

586

587

588

589

590

591 Table S2 Analysis of patients admitted after Remdesivir became available  
592

| Parameter                    | Received Rem*, n=19 | Did not receive Rem, n=28 | P value | Test statistic (95% CIs)             |
|------------------------------|---------------------|---------------------------|---------|--------------------------------------|
| Pure Ischemia/Pure Bleed     | 15/2                | 19/4                      |         |                                      |
| Mean Age                     | 54.95               | 51.79                     | .510    | 3.16 <sup>†</sup> (-6.45 – 12.77)    |
| Mean SpO2 at admission       | 87.16               | 90.54                     | .427    | -3.38 <sup>†</sup> (-11.88 – 5.13)   |
| Mean GCS                     | 9.42                | 9.32                      | .935    | 0.10 <sup>†</sup> (-2.36 – 2.56)     |
| Mean D Dimer nmol/L§         | 29.57               | 32.16                     | .806    | -2.59 <sup>†</sup> (-24.22 – 19.04)  |
| Mean CRP mg/L                | 58.18               | 66.38                     | .705    | -8.21 <sup>†</sup> (-52.23 – 35.81)  |
| Mean Creatinine μmol/L#      | 102.36              | 120.36                    | .317    | -18.00 <sup>†</sup> (-54.01 – 18.00) |
| Large hemispherical infarcts | 4/19                | 8/28                      | .737    | 0.67 <sup>‡</sup> (0.17 – 2.63)      |
| Comorbidities ≥1             | 10/19               | 19/28                     | .365    | 0.53 <sup>‡</sup> (0.16 – 1.75)      |
| Mortality (%)                | 10/19<br>(52.6%)    | 14/28<br>(50.0%)          | .999    | 1.11 <sup>‡</sup> (0.35 – 3.57)      |

593 \*Remdesivir available for use post July 1, n = 47; † Test statistic: Mean difference; ‡ Test  
594 statistic: Odds ratio; § D Dimer values available for 16 patients who received Remdesivir and  
595 11 who did not; || CRP values available for 17 patients who received Remdesivir and 14 who  
596 did not; # Creatinine values available for 19 patients who received Remdesivir and 26 who  
597 did not.

598  
599  
600  
601  
602  
603  
604  
605  
606  
607  
608  
609  
610

611 Table S3 Analysis of patients admitted after Tocilizumab became available

612

613

|                              | Received Toci*, n=7 | Did not receive Toci, n=45 | P value | Test statistic (95% CIs)             |
|------------------------------|---------------------|----------------------------|---------|--------------------------------------|
| Pure Ischemia/Pure Bleed     | 6/0                 | 32/7                       |         |                                      |
| Mean Age                     | 67.00               | 50.13                      | .005    | 16.87 <sup>†</sup> (6.40 – 27.33)    |
| Mean SpO2 at admission       | 82.43               | 90.76                      | .117    | -8.33 <sup>‡</sup> (-19.21 – 2.56)   |
| Mean GCS                     | 9.29                | 9.09                       | .909    | 0.20 <sup>‡</sup> (-3.62 – 4.02)     |
| Mean D Dimer nmol/L§         | 27.15               | 31.84                      | .605    | -4.69 <sup>‡</sup> (-23.28 – 13.91)  |
| Mean CRP mg/L                | 93.17               | 54.38                      | .260    | 38.79 <sup>‡</sup> (-36.99 – 114.58) |
| Mean Creatinine μmol/L#      | 1.36                | 1.22                       | .520    | 12.04 <sup>‡</sup> (-27.41 – 51.49)  |
| Large hemispherical infarcts | 2/7                 | 12/45                      | .999    | 1.10 <sup>‡</sup> (0.19 – 6.44)      |
| Comorbidities ≥1             | 6/7                 | 26/45                      | .228    | 4.38 <sup>‡</sup> (0.49 – 39.50)     |
| Resp. support ≥NRBM          | 5/7                 | 13/45                      | .041    | 6.15 <sup>‡</sup> (1.06 – 35.84)     |
| Mortality (%)                | 3/7 (42.9%)         | 24/45 (53.3%)              | .698    | 0.66 <sup>‡</sup> (0.13 – 3.27)      |

614 \*Tocilizumab available for use post May 13, n = 52; † Test statistic: Mean difference; ‡ Test  
 615 statistic: Odds ratio; § D Dimer values available for 7 patients who received Tocilizumab and  
 616 20 who did not; || CRP values available for 6 patients who received Tocilizumab and 25 who  
 617 did not; # Creatinine values available for 7 patients who received Tocilizumab and 43 who  
 618 did not.

619
